# Supplementary material for: Comparison of Empirical Zn2+ Models in Protein–DNA Complexes
Source: MDPI journal article supplement (doi:10.3390/biophysica3010014), 2023-03-20
Supplement: s1 [file s1]

Archive with 1 entries (1 files):
- biophysica-2244671-supplementary.pdf
